# Supplementary material for: Boronate-mediated covalent and oriented immobilization of antibodies on the PDMS surface toward improved capture of circulating tumor cells
Source: Royal Society of Chemistry journal article supplement (doi:10.1039/d5lc00862j), 2025-12-02
Supplement: d5lc00862j1.pdf [file d5lc00862j1.pdf]

## Supporting Information

### Boronate-Mediated Covalent and Oriented Immobilization of Antibodies on PDMS surface Toward Improved Capture of Circulating Tumor Cells

Ke-Hong Lyu,<sup>a,†</sup> Jin-Wei Chen,<sup>a,†</sup> Dun-Yuan Jin,<sup>a</sup> Yu-Ju Huang,<sup>b</sup> Hsiung-Lin Tu,<sup>b</sup>

Avijit K. Adak,<sup>a,\*</sup> and Chun-Cheng Lin<sup>a,c,\*</sup>

| Table of content                                                                                                         | Page No. |
|--------------------------------------------------------------------------------------------------------------------------|----------|
| 1. Optimization of zwitterionic concentration ( <b>Fig. S1</b> ):                                                        | 2        |
| 2. Evaluation of alkyne-surface functionalization ( <b>Fig. S2</b> ):                                                    | 2        |
| 3. Optimization of BA-Tosyl probe concentration ( <b>Fig. S3</b> ):                                                      | 3        |
| 4. Optimization of antibody concentration and incubation time ( <b>Fig. S4</b> ):                                        | 3        |
| 5. Evaluation of capping reagents ( <b>Fig. S5</b> ):                                                                    | 4        |
| 6. Comparison of boronate-mediated antibody immobilization with Protein G-based Fc-directed assembly ( <b>Fig. S6</b> ): | 4        |
| 7. Fluorescence microscopy images of the microfluidic channels ( <b>Fig. S6</b> ):                                       | 5        |
| 8. Chemical compounds:                                                                                                   | 5        |
| 9. References:                                                                                                           | 6        |

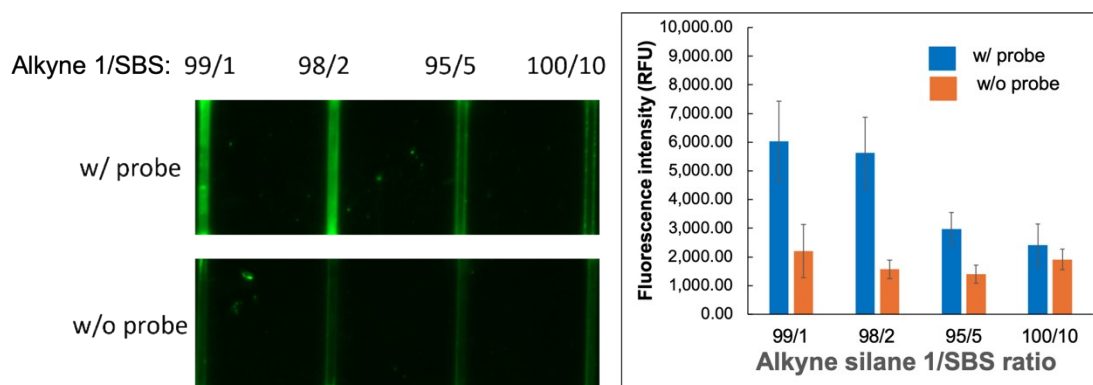

**Fig. S1** Optimization of zwitterion concentration. PDMS microchannels were silanized with different molar ratios of alkyne 1/SBS (1–10 mol%) and subsequently functionalized with BA-Tosyl. After incubation with Herceptin and detection using anti-human IgG (Fab'-specific) Ab-Cy3, fluorescence intensity was quantified. The fluorescence intensity indicated optimal surface modification at 2 mol% SBS, yielding high fluorescence and low nonspecific adsorption. Error bars represent standard deviation (SD) from three independent experiments. Representative fluorescence images (with and without probe) are shown.

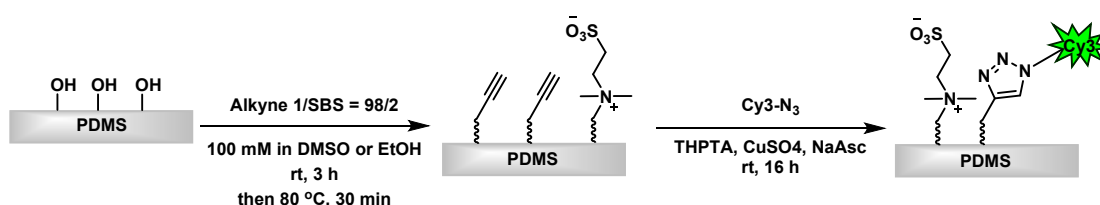

**Fig. S2** Evaluation of alkyne-surface functionalization. Schematic representation of the mixed monolayer-protection and silanization on PDMS microfluidic channels using alkynyl triethoxysilane **1**, and SBS and the CuAAC reaction.

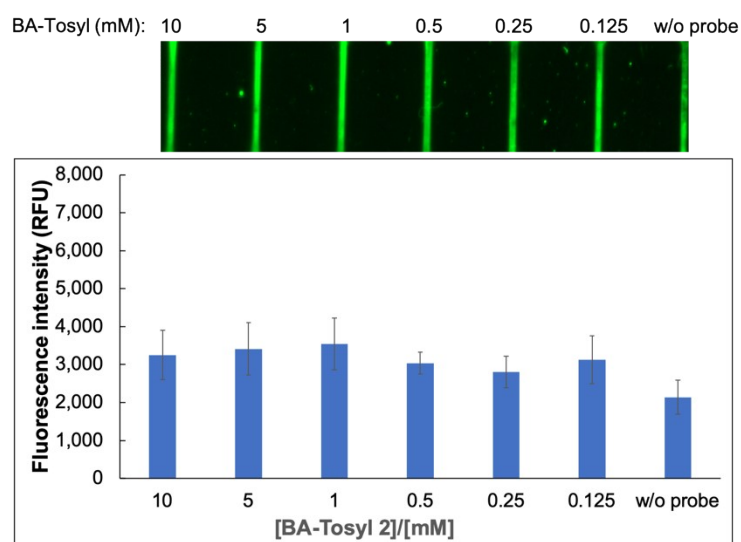

**Fig. S3** Optimization of BA-Tosyl probe concentration. Alkynylated PDMS microchannels were modified with BA-Tosyl probes at concentrations ranging from 0.25 to 10 mM, followed by antibody (Herceptin) incubation and detection with anti-human IgG (Fab'-specific) Ab-Cy3. The fluorescence intensity reached saturation between 1 and 5 mM, with a slight decrease at 10 mM. Error bars represent SD from three replicate experiments. Representative fluorescence images at each concentration are shown.

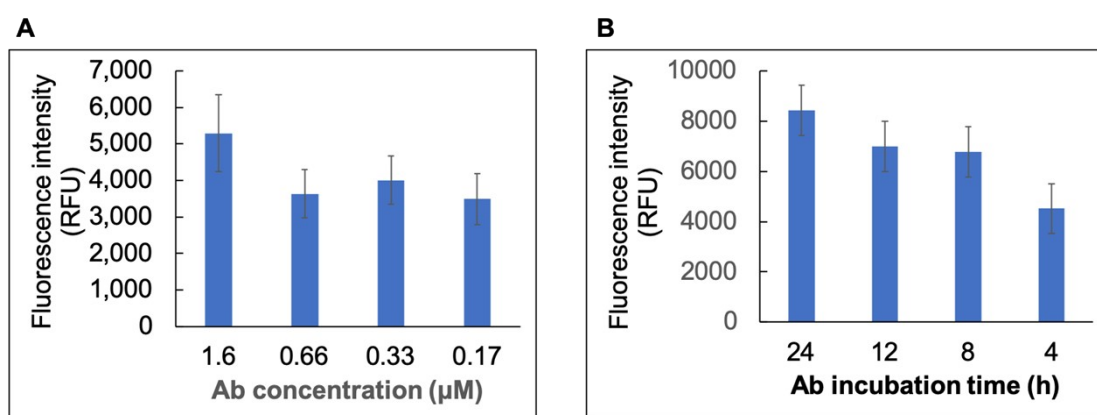

**Fig. S4** Optimization of antibody concentration and incubation time. BA-functionalized PDMS microchannels were incubated with antibodies (a) at varying concentrations (0.17–1.6 μM) and (b) for different time periods (4–24 h). Fluorescence signals were measured using anti-human IgG (Fab'-specific) Ab-Cy3. (A) Antibody concentration. (B) Incubation time. Error bars represent SD from three replicate experiments.

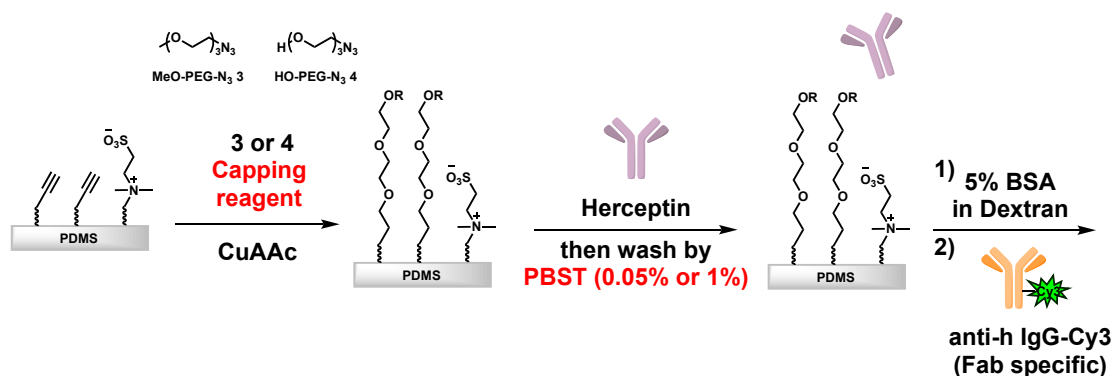

**Fig. S5** Evaluation of capping reagents. Alkyne-modified surfaces were capped with capping reagents **3** or **4**. The representative fluorescence images with different washing buffers are shown in Figure 4B in the main text.

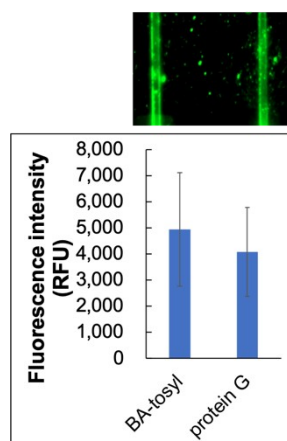

**Fig. S6** Comparison of boronate-mediated antibody immobilization with Protein G-based Fc-directed assembly. Herceptin was immobilized on PDMS microchannels either through BA-Tosyl functionalization (boronate-affinity covalent coupling) or via Protein G attached to NHS-activated surfaces (Fc-directed immobilization). Following incubation with biotinylated HER2 antigen and detection using streptavidin-Cy3, the fluorescence signal was quantified. Boronate-mediated immobilization exhibited ~1.2-fold higher antigen binding signal relative to Protein G, indicating improved antibody orientation and covalent stability. Error bars represent SD. Representative fluorescence images for both strategies are shown.

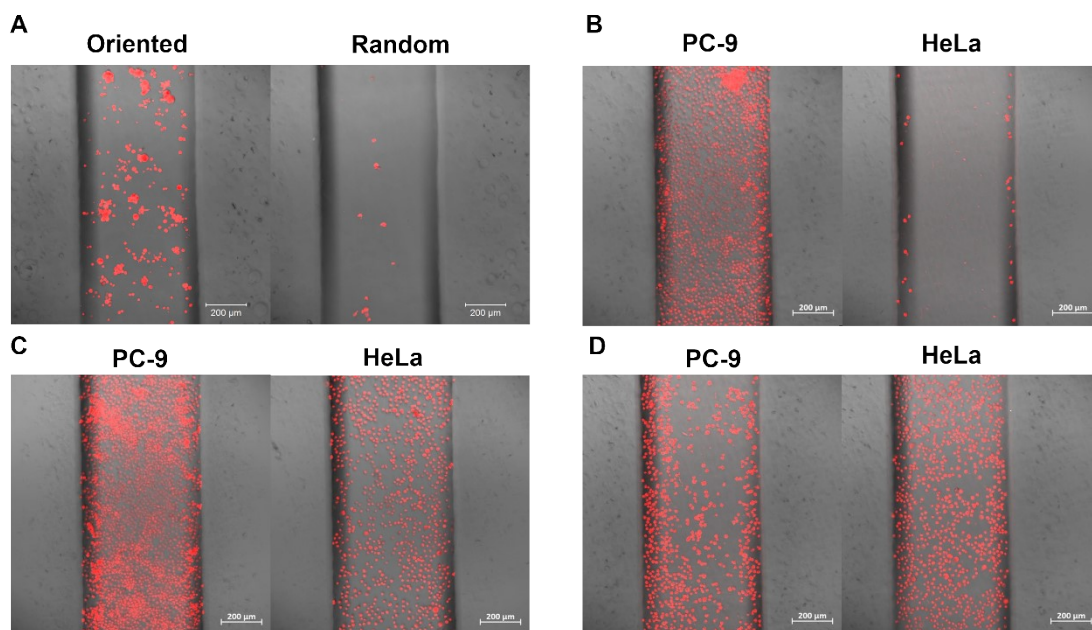

**Fig. S7** Fluorescence microscopy images of the microfluidic channels (A) Figure 6A. (B) Figure 6B. (C) Figure 6C. (D) Figure 6D in the main text.

### Chemical compounds.

Compound **1**<sup>1</sup>, **2**<sup>2</sup>, **3**<sup>3</sup>, **4**<sup>4</sup>, **5**<sup>5</sup>, and **6**<sup>2</sup> were synthesized according to previously reported procedures.

## References

1. Isoppo. V. G.; Rodrigues. M. O.; Rodembusch. F. S.; Moro. A. V. *Journal of Photochemistry and Photobiology A: Chemistry* **2022**, *435*, 114277.
2. Adak. A. K.; Huang K.-T.; Li. P.-J.; Fan. C.-Y.; Lin. P.-C.; Hwang. K.-C.; Lin. C.-C. *ACS Appl. Bio Mater.*, **2020**, *3*, 6756-6767.
3. Xu. X.; Seiffert. A. K.; Lenaerts. R.; Ryskulova. K.; Jana.S.; Hecke. K. V.; Jerca. V. V.; Hoogenboom. R. *Dalton Trans.* **2021**, *50* (25), 8746–8751.
4. Lam. S. N.; Acharya. P.; Wyatt. R.; Kwong. P. D.; Bewley. C. A. *Bioorganic & Medicinal Chemistry* **2008**, *16* (23), 10113–10120.
5. Huang. L. D.; Adak. A. K.; Yu. C. C.; Hsiao. W. C.; Lin. H. J.; Chen. M. L.; Lin. C. C. *Chemistry - A European Journal* **2015**, *21* (10), 3956–3967.
